# Supplementary material
Source: Springer Nature journal article supplement (https://www.springermedizin.de/resource/supplementary/12889_2012_4453_MOESM2_ESM.pdf/9492888)
Supplement: MOESM2 [file 9492888]

**Population = 33347**

Random stratified sampling procedure

**Sample = 1294**

Not located for the interview = 179

Interview = 1124

Not located for the clinical evaluation = 179

Clinical evaluation = 945

Refused Oral evaluation = 107

Oral Evaluation = 838

Incomplete data to establish frailty = 139

**Information needed to establish frailty = 699**
